# Supplementary material for: Stability and properties of the Ru–H system at high pressure
Source: Royal Society of Chemistry journal article supplement (doi:10.1039/c5cp06617d), 2015-11-23
Supplement: c5cp06617d1.pdf [file c5cp06617d1.pdf]

## Supporting Information

### Stability and Property of Ru-H System at High Pressure

*Yunxian Liu, Defang Duan, Fubo Tian, Chao Wang, Yanbin Ma, Da Li, Xiaoli*

*Huang, Bingbing Liu, and Tian Cui\**

State Key Laboratory of Superhard Materials, College of Physics, Jilin University,  
Changchun, 130012, P. R. China

**Table S1.** Calculated structural parameters of our predicted stable structures for Ru-H system at their corresponding pressures.

| Space group<br>Pressure                   | Lattice parameters<br>(Å, °) | Atomic coordinates (fractional) |          |         | Sites   |    |
|-------------------------------------------|------------------------------|---------------------------------|----------|---------|---------|----|
| $Fm\bar{3}m$ -RuH<br>100GPa               | a=3.7267                     | H1                              | -0.50000 | 0.50000 | 0.50000 | 4b |
|                                           | b=3.7267                     | Ru1                             | 0.00000  | 0.00000 | 0.00000 | 4a |
|                                           | c=3.7267                     |                                 |          |         |         |    |
|                                           | $\alpha=\beta=\gamma=90$     |                                 |          |         |         |    |
| $Pm\bar{3}m$ -RuH <sub>3</sub><br>100 GPa | a=2.598                      | H1                              | 0.00000  | 0.00000 | 0.50000 | 3d |
|                                           | b=2.598                      | Ru1                             | 0.50000  | 0.50000 | 0.50000 | 1b |
|                                           | c=2.598                      |                                 |          |         |         |    |
|                                           | $\alpha=\beta=\gamma=90$     |                                 |          |         |         |    |
| $Pm\bar{3}n$ -RuH <sub>3</sub><br>200 GPa | a=3.1008                     | H1                              | 0.00000  | 0.50000 | 0.25000 | 6c |
|                                           | b=3.1008                     | Ru1                             | 0.00000  | 0.00000 | 0.00000 | 2a |
|                                           | c=3.1008                     |                                 |          |         |         |    |
|                                           | $\alpha=\beta=\gamma=90$     |                                 |          |         |         |    |
| $Pm$ -OsH <sub>6</sub><br>50 GPa          | a=4.87                       | H1                              | 0.29423  | 0.79604 | 0.27701 | 2c |
|                                           | b=5.6495                     | H2                              | 0.70330  | 0.71738 | 0.97576 | 2c |
|                                           | c=4.866                      | H3                              | 0.99344  | 0.72295 | 0.68680 | 2c |
|                                           | $\alpha=90$                  | H4                              | 0.70290  | 0.28592 | 0.68713 | 2c |
|                                           | $\beta=119.3788$             | H5                              | 0.29140  | 0.22593 | 0.98690 | 2c |

|                               |                          |     |          |          |         |     |
|-------------------------------|--------------------------|-----|----------|----------|---------|-----|
|                               | $\gamma=90$              | H6  | 0.00296  | 0.22539  | 0.27370 | 2c  |
|                               |                          | H13 | 0.13461  | -0.00000 | 0.62136 | 1a  |
|                               |                          | H14 | 0.03989  | -0.00000 | 0.93453 | 1a  |
|                               |                          | H15 | 0.64392  | -0.00000 | 0.11900 | 1a  |
|                               |                          | H16 | 0.94809  | -0.00000 | 0.01841 | 1a  |
|                               |                          | H17 | 0.74420  | -0.00000 | 0.52941 | 1a  |
|                               |                          | H18 | 0.54718  | -0.00000 | 0.73103 | 1a  |
|                               |                          | H19 | 0.26233  | 0.50000  | 0.43775 | 1b  |
|                               |                          | H20 | 0.94450  | 0.50000  | 0.89729 | 1b  |
|                               |                          | H21 | 0.84486  | 0.50000  | 0.29908 | 1b  |
|                               |                          | H22 | 0.05816  | 0.50000  | 0.06766 | 1b  |
|                               |                          | H23 | 0.30801  | 0.50000  | 0.82379 | 1b  |
|                               |                          | H24 | 0.45162  | 0.50000  | 0.23376 | 1b  |
|                               |                          | Ru1 | 0.66593  | 0.25011  | 0.31299 | 2c  |
|                               |                          | Ru2 | 0.33027  | 0.74996  | 0.64878 | 2c  |
| <i>Imma</i> -OsH <sub>6</sub> | a=7.9047                 | H1  | 0.36766  | 1.03443  | 0.34801 | 16j |
| 100 GPa                       | b=5.3247                 | H9  | 0.50000  | 0.81936  | 0.47210 | 8h  |
|                               | c=4.7549                 | H10 | -0.00000 | 0.58267  | 0.69928 | 8h  |
|                               | $\alpha=\beta=\gamma=90$ | H17 | -0.10493 | 0.75000  | 0.32278 | 8i  |
|                               |                          | H21 | 0.20685  | 1.25000  | 0.03547 | 8i  |
|                               |                          | Ru1 | 0.17097  | 0.50000  | 0.50000 | 8f  |

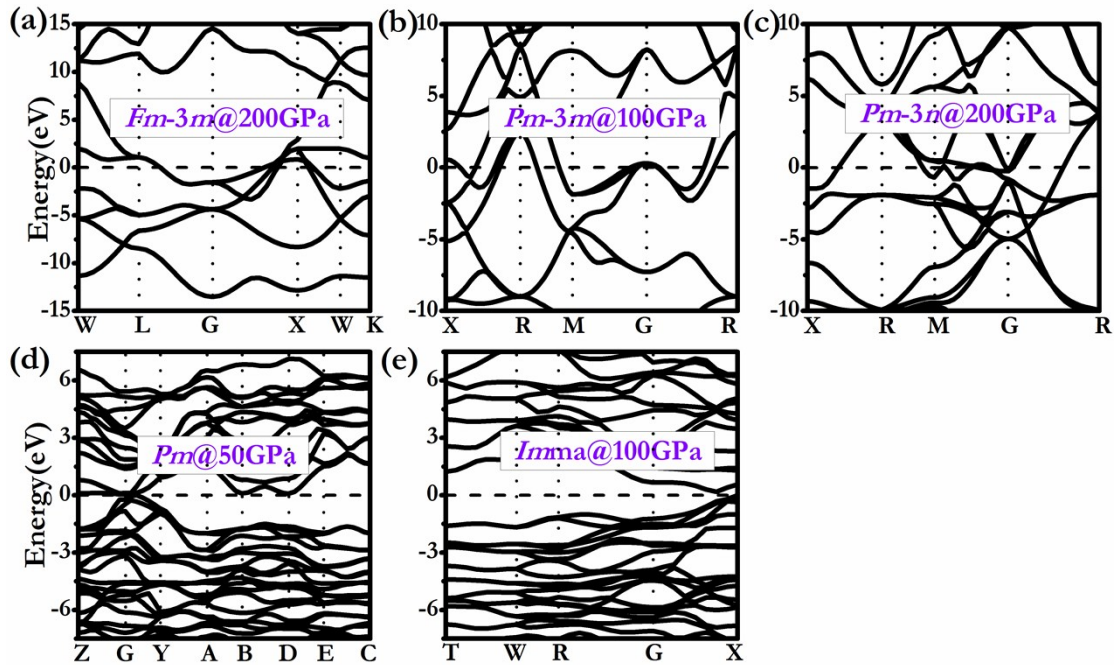

**Fig. S1.** The electronic band structures of the *Fm* $\bar{3}m$  (RuH), *Pm* $\bar{3}m$  (RuH<sub>3</sub>), *Pm* $\bar{3}n$  (RuH<sub>3</sub>), *Pm* (RuH<sub>6</sub>) and *Imma* (RuH<sub>6</sub>) at 200, 100, 200, 50, 100 GPa, respectively.

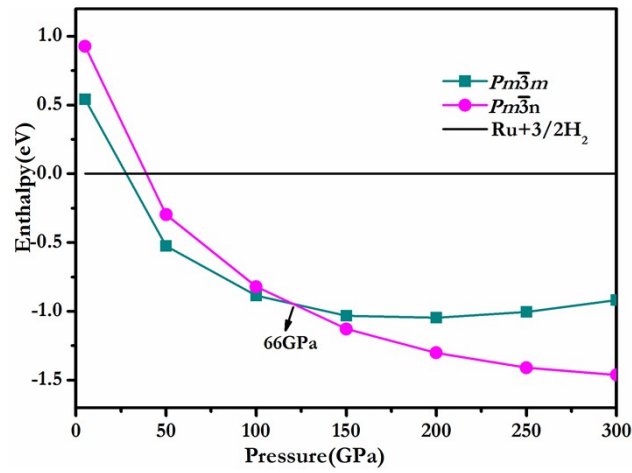

**Fig. S2.** Enthalpy curves (relative to Ru and H<sub>2</sub>) for RuH<sub>3</sub> in the pressure range from 0 to 300 GPa.

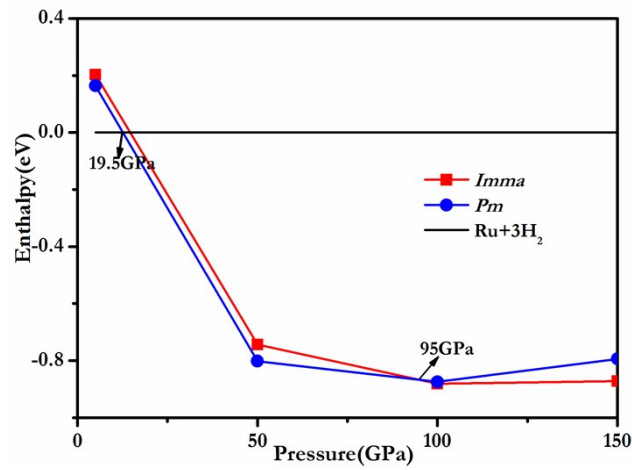

**Fig. S3.** Enthalpy curves (relative to Ru and H<sub>2</sub>) for RuH<sub>6</sub> in the pressure range from 5 to 150 GPa.
